# Supplementary material for: A Multilevel Analysis of Urban Green Infrastructure Planning Gaps for Climate Resilience in Córdoba Argentina
Source: Research Square preprint supplement (doi:10.21203/rs.3.rs-8031630/v1), 2025-12-17
Supplement: Supplementary file 1 [file a513c79766c0982f99e9983d.docx]

**Supplementary Material 1**

*Guiding Questions for Interviews with Officials and Experts*

This annex presents the questions that guided the interviews with the various stakeholders. As a semi-structured method was applied, some questions were reformulated during the personal exchanges.

Municipal Official

Does the administration use any operational or general criterion to determine what qualifies as a green space and what does not?

In your opinion, how would you define a green space, or what characteristics should an area have to be considered as such?

Is there an updated mapping of green spaces? How frequently is it updated?

Is there any survey or map showing the current state of green spaces in terms of actual vegetation cover or effective green area?

In your view, how useful would it be to have this information mapped?

In your opinion, what are the main environmental services provided by green spaces?

Is there any survey or mapping that associates green spaces with specific ecosystem services? If so, do you think it could contribute to management? In what way?

During maintenance and management of green spaces, are their beneficial effects in terms of mitigation and control taken into account, so that interventions aim to enhance those positive outcomes?

Is there any survey or mapping of mitigation and control needs associated with land uses to guide green space management?

Based on your knowledge of the city, its management and the characteristics of green spaces, do you believe they are sufficient (in quantity and quality) to mitigate negative effects?

Are there areas of the city lacking or having insufficient green spaces?

Is there any record or identification of specific impacts on the city? Are they associated with particular areas?

Is there any planning for green space design considering the functionality that should be prioritized to mitigate the adverse effects of climate change through ecosystem services?

What tools do you think would be useful to improve green space planning and management and make it more efficient?

In your opinion, what variables or indicators would be essential to monitor to improve green space planning and management?

Provincial officials

In this context, how would you define or conceptualize urban natural spaces?

What essential characteristics should an area have to be included in this category?

Are you familiar with the concept of green infrastructure? (Yes/No)

If Yes: What similarities and differences do you see between GI and urban natural spaces?

What functions should urban natural spaces fulfill in terms of environmental/ecosystem services?

Which s the role of biodiversity, and why is its conservation important in urban and peri-urban areas?

Is there any survey, record or identification of the effects on cities? Are they associated with specific zones?

Is there a planning framework (guideline of criteria) for green space design that prioritizes functionality to deliver ecosystem services mitigating climate change effects?

Based on your expertise, what key variables or indicators should be monitored to support green space planning and management?

What tools or strategies would improve the efficiency of green space planning and management?

Scientists and Professionals

In your opinion, how would you define urban green infrastructure (UGI)?

Which essential characteristics should a space have to be considered UGI?

The bibliography presents various conceptual frameworks (e.g., ecosystem services, nature’s contributions to people). From your perspective, how would you define urban ecosystem services (UES)?

In your view, which are the key ecosystem services that UGI should provide?

What role does biodiversity play in urban settings, and which elements do you consider the most critical?

Which tools or strategies would enhance the capacity of UGI to deliver UES?

Based on your expertise, what key variables or indicators should be prioritized for monitoring UGI both at site-specific scale (individual UGI units) and city-wide scale (landscape level)?

Which tools or approaches could integrate these indicators across multiple scales?

What do you think about the statement:

*"UGI planning should prioritize generating those UES that enhance urban resilience, based on local-scale challenges."?*

In your view, which are the main threats or constraints urban green infrastructure (UGI) is facing, including both biophysical processes and their inherent characteristics, and planning and management perspectives?

**Supplementary Material 2**

Table 1 Synthesis of Results Normative Analysis

| **Normative** | **Climate Change** | **UGI** | **UES** | **Observations** |
| --- | --- | --- | --- | --- |
| **International: Convention on Biological Diversity** | Linking biodiversity to climate stability. | Promotes biodiversity conservation as a basis for UGI | Recognizes UES as beneficial to human well-being. | Little applicability on a local scale. Important theoretical contribution. |
| **International: París Agreement** | Framework for mitigation and adaptation actions | Ecological restoration as a pillar for UGI | UES as a key to adaptation in cities (Resilience) | Little applicability at subnational scales. Important theoretical contribution |
| **Internacional: Sustainable Development Goals** | SDG 13: Climate action; SDG 11: Resilient cities. | SDG 15: UGI to sustain urban biodiversity | UES integrated in sustainability goals | General guidelines for climate action |
| **National: Law on Minimum Standards for Climate Change Adaptation and Mitigation N°27.520** | National Plan guides adaptation and mitigation actions | UGI as a core strategy in cities | UES linked to climate risk reduction. | no effective articulation with provinces and municipalities. |
| **Provincial: Laws N°9.841 and N°10.004** | No explicit mention of climate change | Green Recreational Areas as equivalent to UGI (parks, reserves). | Does not address UES  . | Norms that prioritize urban expansion over UGI. Lack of ecological criteria |
| **Green Lungs Program** | SDG 13: Climate action | SDG 15: UGI to sustain urban biodiversity | Recognizes UES as beneficial to human well-being | Program's voluntary adoption by municipalities |
| **Municipal: Ordinance N° 8.060/1985 and N° 8.133/1985** | No climate focus | Exige 10% del loteo destinado a espacio verde. | Does not address UES | Outdated land-use classification criteria lacking ecological quality and multifunctionality |
| **Municipal: Ordinance N°9.962/1998** | Environmental focus without explicit mention | Green Spaces categorized by environmental function | Consider the UES needed by the city | Needs conceptual updating, has valid criteria |
| **Municipal: Ordinance N° 12.370/2014** | Focused on generating actions for adaptation and mitigation to Climate Change | Green Corridors to promote IGU connectivity | Promoting Environmental Services to control heat island | Low applicability. Lack of monitoring and control tools |
| **Municipal: Ordinance N° 12.472/2015** | No climate focus | Regulates tree species to be planted | Does not address UES | No planning of trees under urban resilience criteria |
| **Municipal: Ord. 12.548/2016** | Urban Heat Island Mitigation Strategy | Hybrid UGI at building scale | UES limited to building scale. | Lack of systemic vision in the planning of the hybrid IGU |

Table 2: Synthesis of interview results

| **Conceptual dimension** | **Municipal official** | **Provincial official** | **Scientists / professionals** | **Observations** |
| --- | --- | --- | --- | --- |
| **Definition of UGI and characteristics** | UGI as equivalent to “public green space”. They emphasize social use and the provision of UES. | Same framework as the municipality. Emphasizes the connectivity of the IGU | UGI as a network of natural/semi-natural, multifunctional, multi-scale, connected spaces. Biocentric approach | State planning is a common thread; practitioners integrate ecological and complex planning perspectives |
| **UES and UGI** | Identify general ESUs, but without linking them to biophysical processes or addressing the interdependence of UGI and UES | Similar to the municipal approach. There is an association between UES and biodiversity | Broad conceptual management. Focus on human-ecological interdependence and “commons” perspective. . | Officials with a reductionist vision  limits planning. Ecological and social complexity must be approached from an interdisciplinary perspective |
| **Role of biodiversity** | Biodiversity associated with species abundance and landscape enhancement | Link biodiversity to identity values (native species) and to a cultural role with a broad territorial perspective | Biodiversity as a complex network of organisms and habitats that generate UES | Officials do not link biodiversity with integral UES (except cultural). Professionals emphasize the systemic role of biodiversity |
| **Tools to enhance UES** | Strategies focused on afforestation and tree maintenance. Lack of planning tools | Ecological restoration as a guiding concept. Lack of planning tools | Participatory planning of public policy, production and access to information, environmental education | Municipal/provincial approach reduced to urban trees; professionals propose integrated and participatory management |
| **Tools, Variables and Indicators for UGI Planning** | Urban tree management variables without a view of environmental complexity | Lack of indicators and monitoring strategies. | They use complex tools to analyze multidimensional variables and indicators | Technologies and integrated approaches to planning are available. There is a lack of technical capacity in the state for planning |
| **Threats Facing UGI** | real estate developers as the main threat (partial compliance with regulations). | Lack of information for planning. | Real estate development, anthropization, soil sealing, contamination. Lack of citizen participation and planning | Consensus on the threat of real estate development, professionals broaden their criticism to institutional failures and lack of participation |
